# Supplementary material for: Genetic dissection of morphological variation in rosette leaves and leafy heads in cabbage (Brassica oleracea var. capitata)
Source: PubMed Central journal article supplement (PMC9519658; doi:10.1007/s00122-022-04205-w), 2022-09-03

Leaf Area (rosette stage). Population structure correction based on Principal Coordinates and Kinship (left), or Kinship only (right).

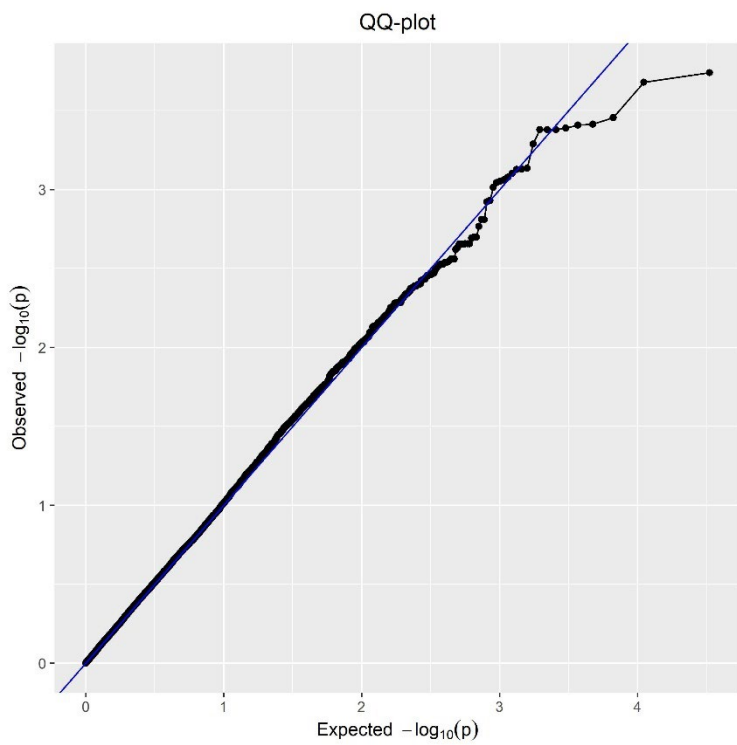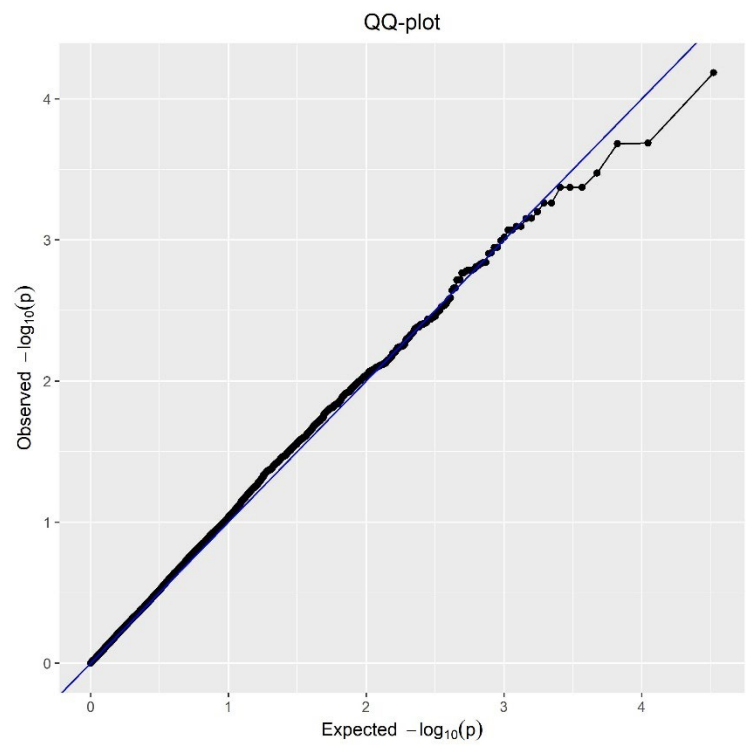

Leaf Width (rosette stage). Population structure correction based on Principal Coordinates and Kinship (left), or Kinship only (right).

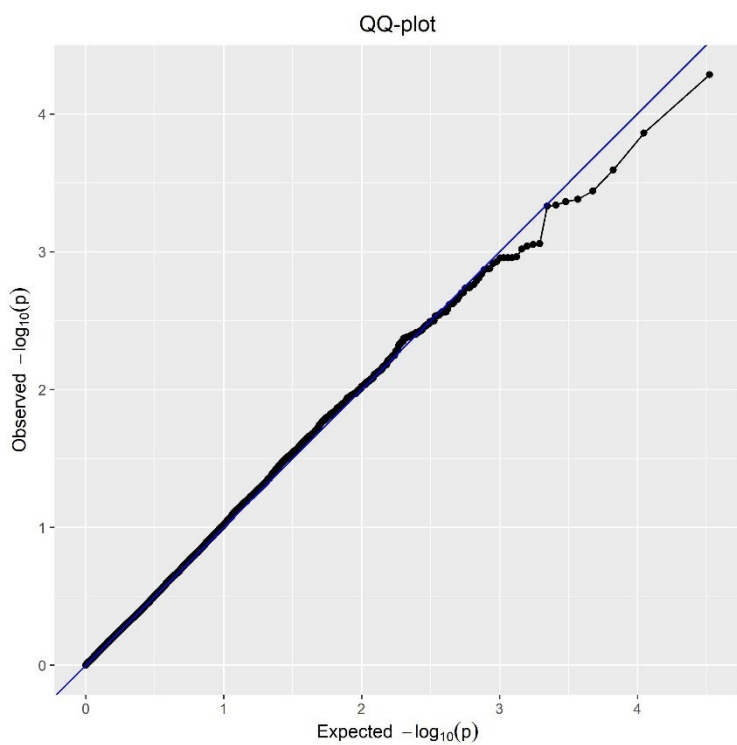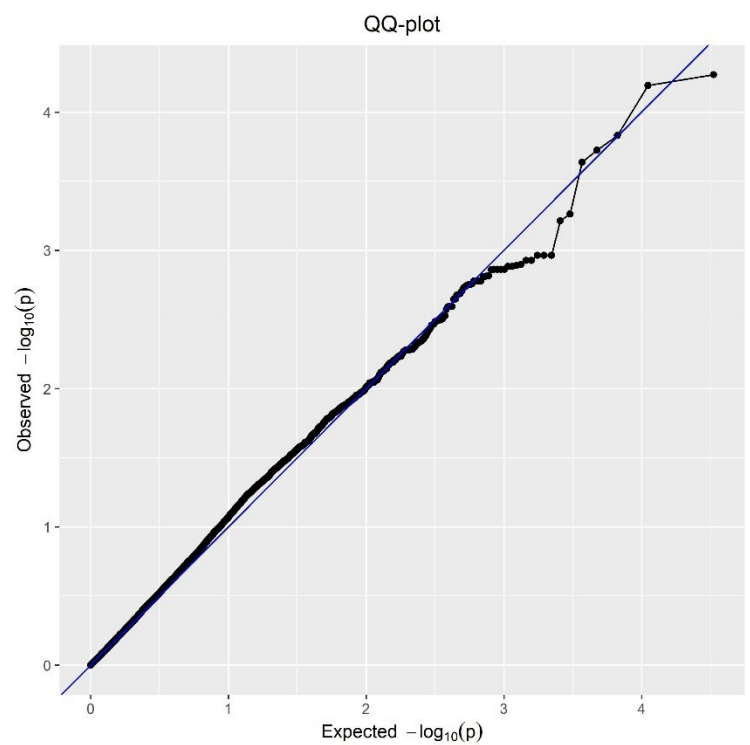

Leaf Length (rosette stage). Population structure correction based on Principal Coordinates and Kinship (left), or Kinship only (right).

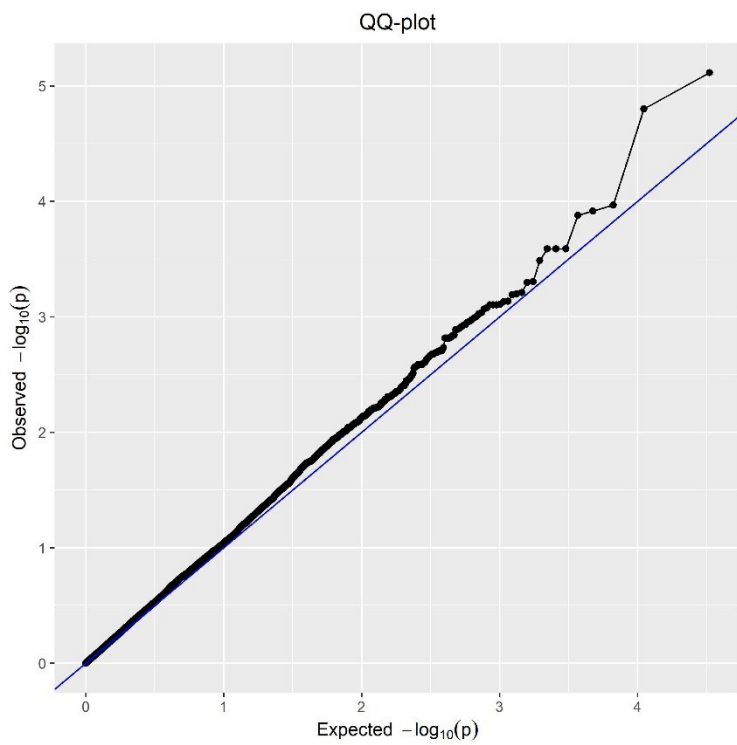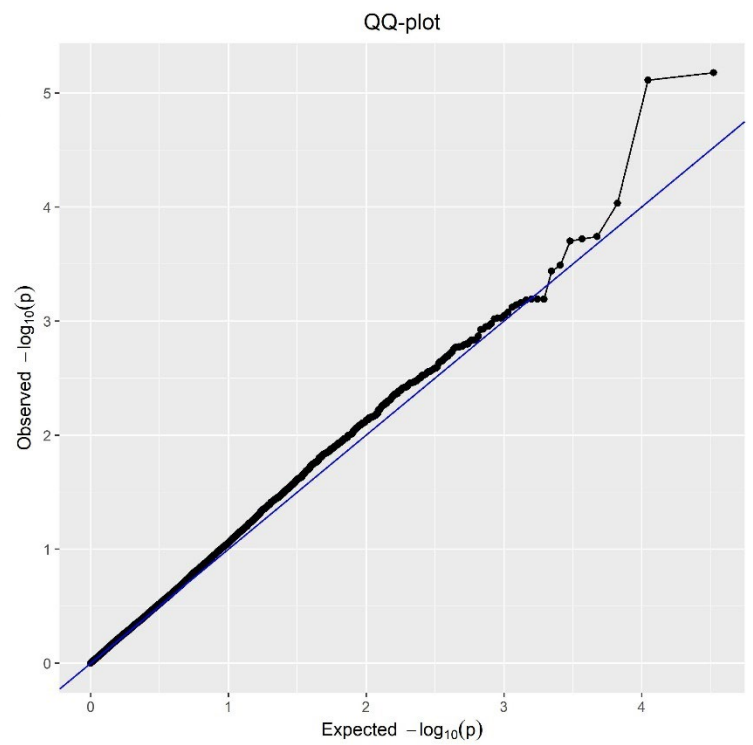

Leaf Ratio (rosette stage). Population structure correction based on Principal Coordinates and Kinship (left), or Kinship only (right).

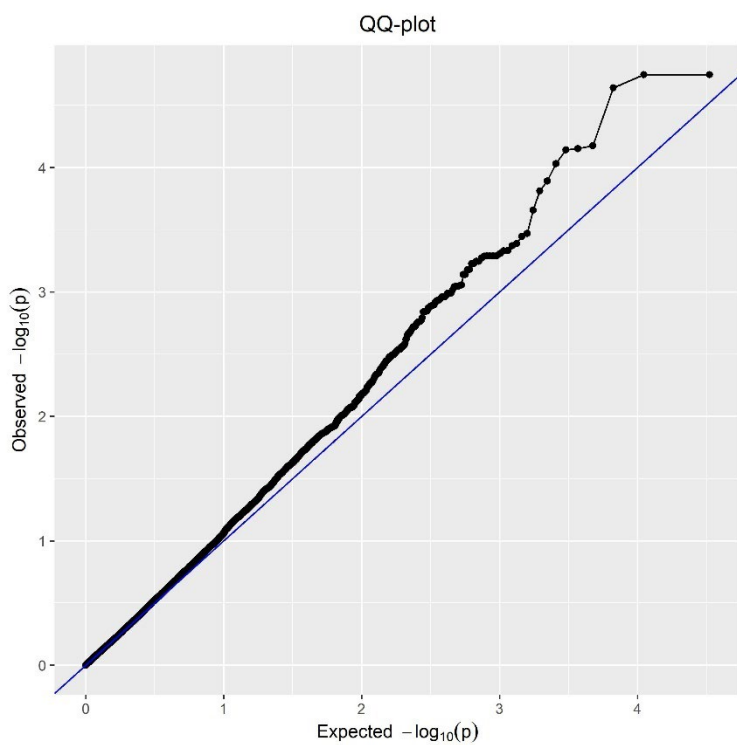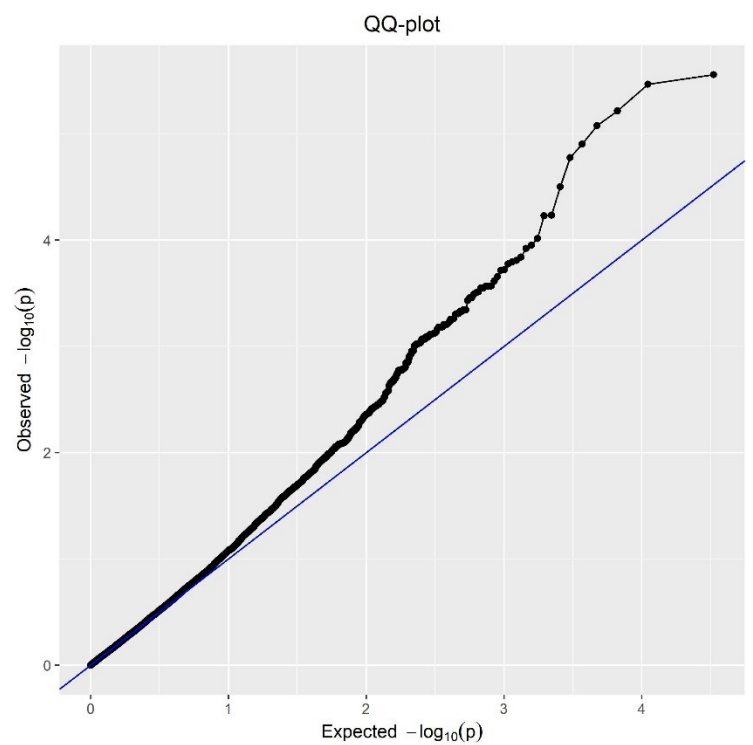

Leaf Area (heading stage). Population structure correction based on Principal Coordinates and Kinship (left), or Kinship only (right).

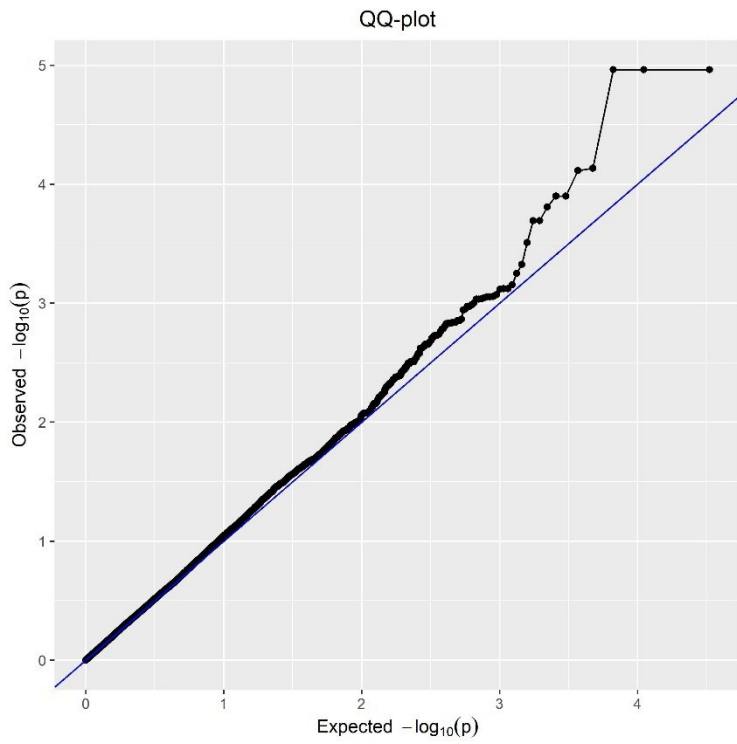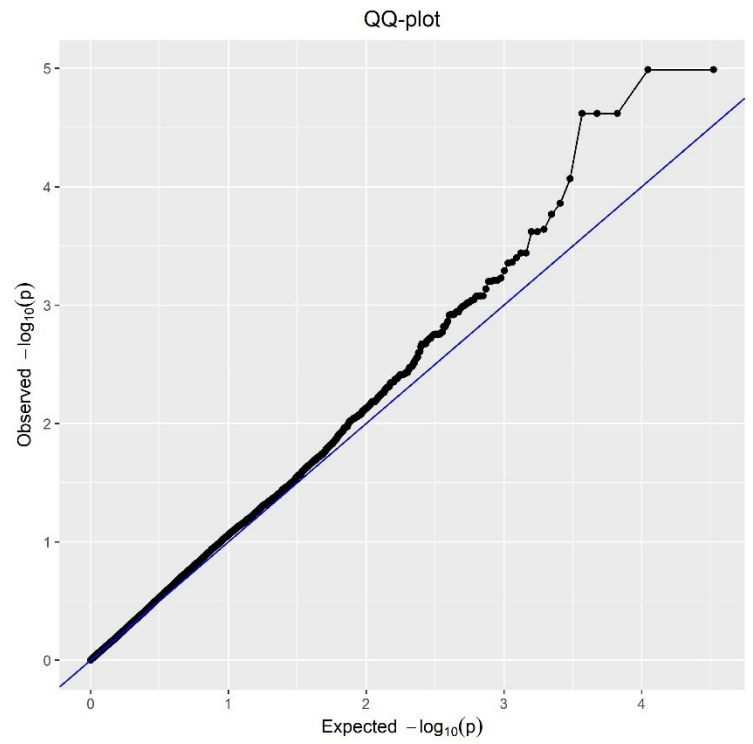

Leaf Width (heading stage). Population structure correction based on Principal Coordinates and Kinship (left), or Kinship only (right).

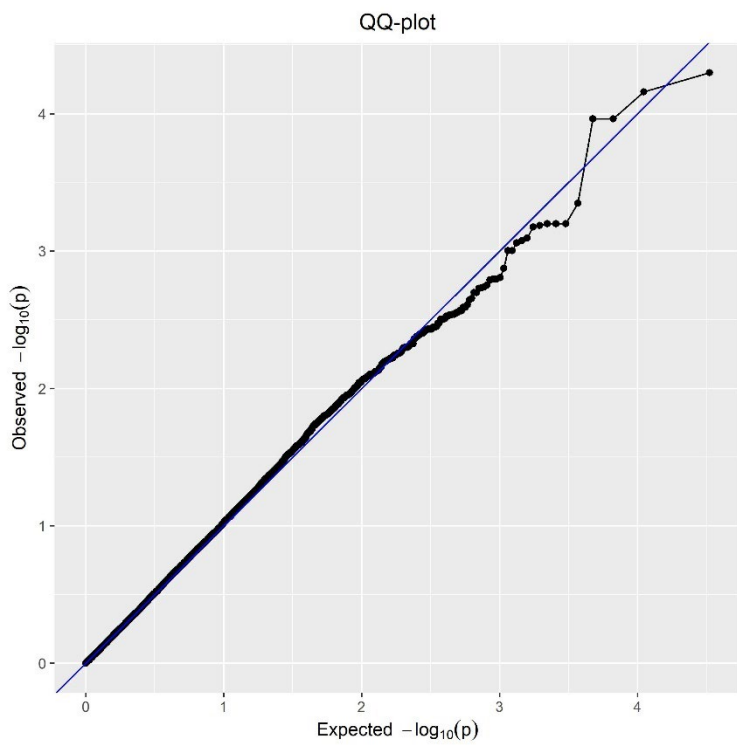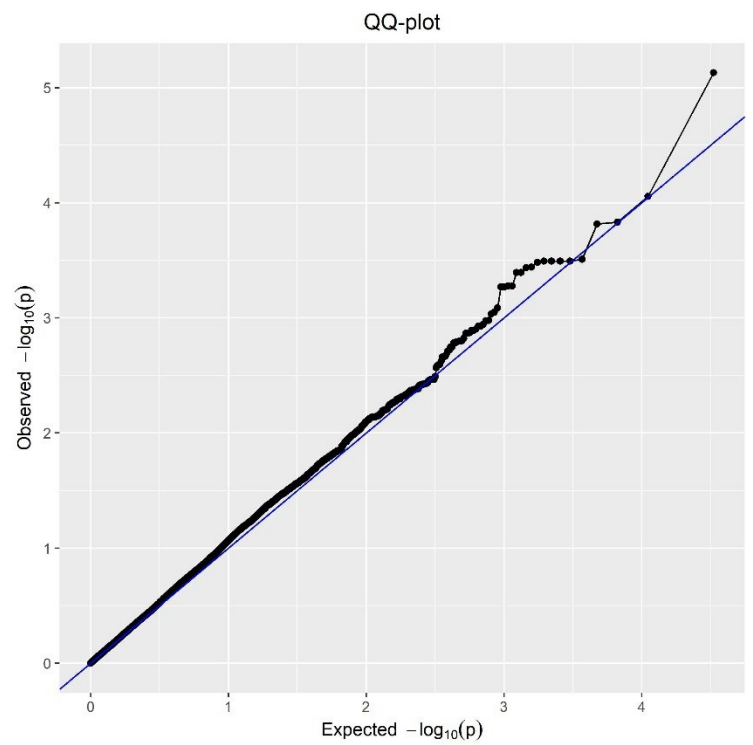

Leaf Length (heading stage). Population structure correction based on Principal Coordinates and Kinship (left), or Kinship only (right).

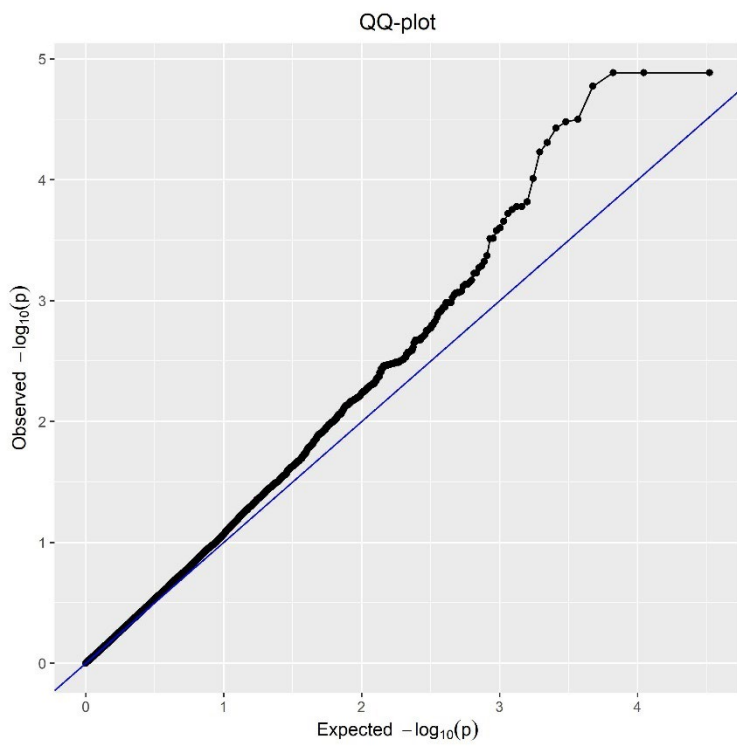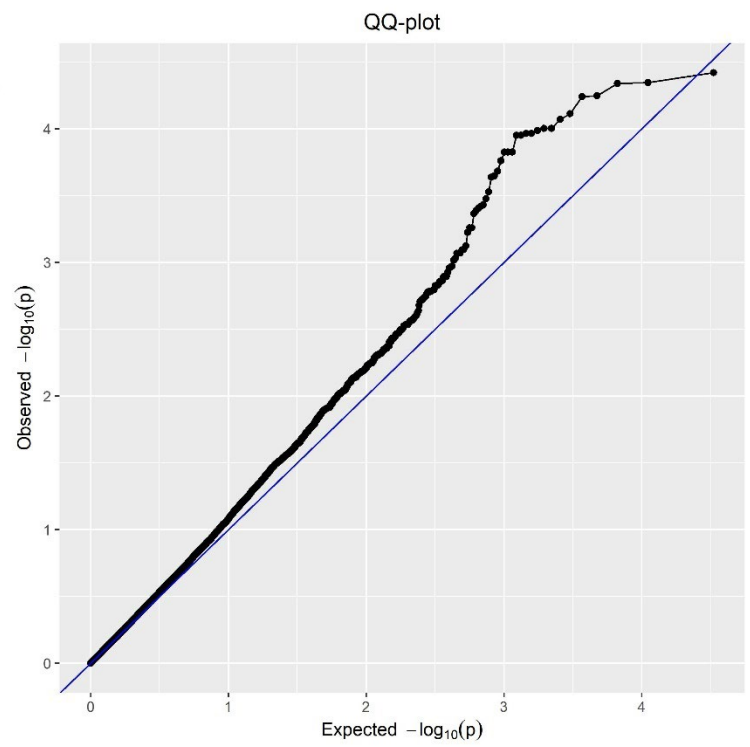

Leaf Ratio (heading stage). Population structure correction based on Principal Coordinates and Kinship (left), or Kinship only (right).

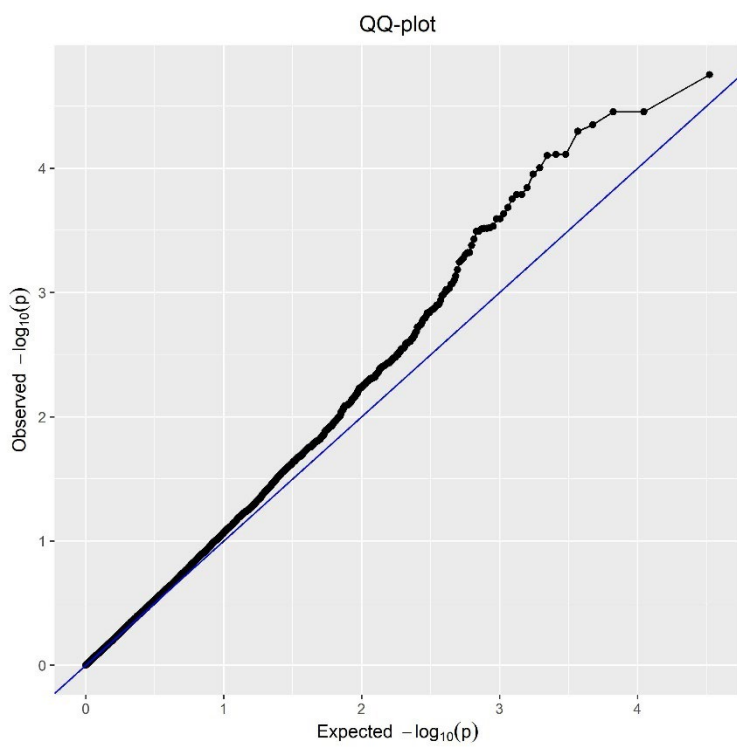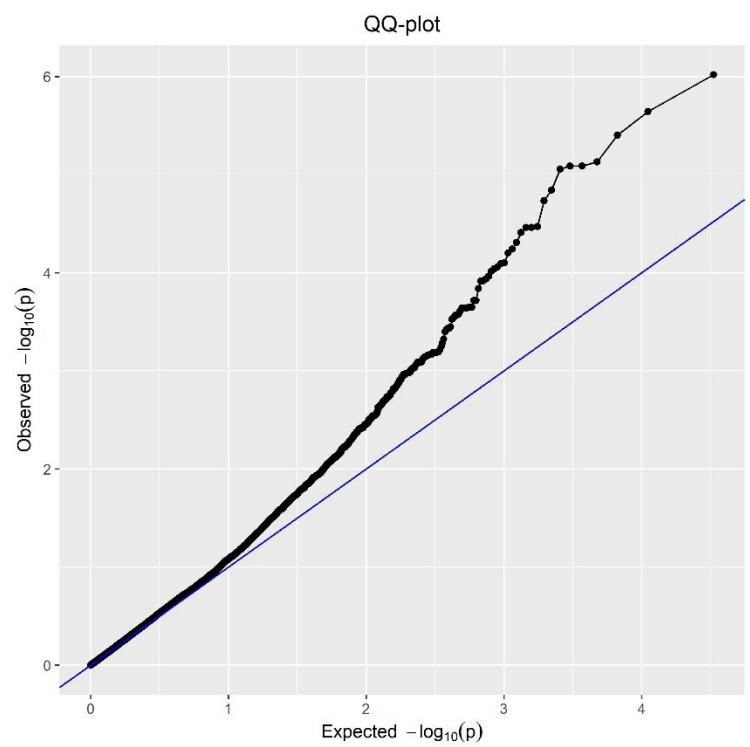

Head Area. Population structure correction based on Principal Coordinates and Kinship (left), or Kinship only (right).

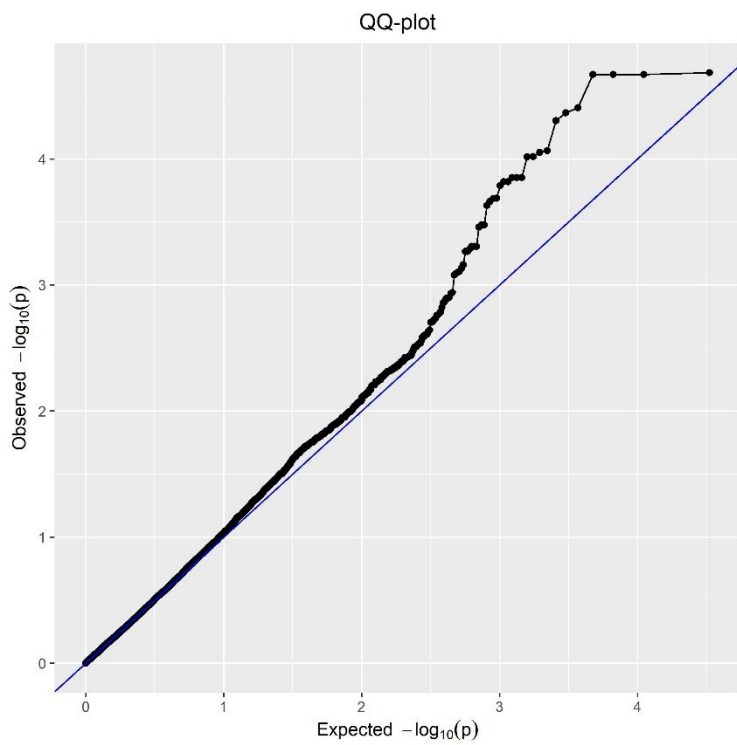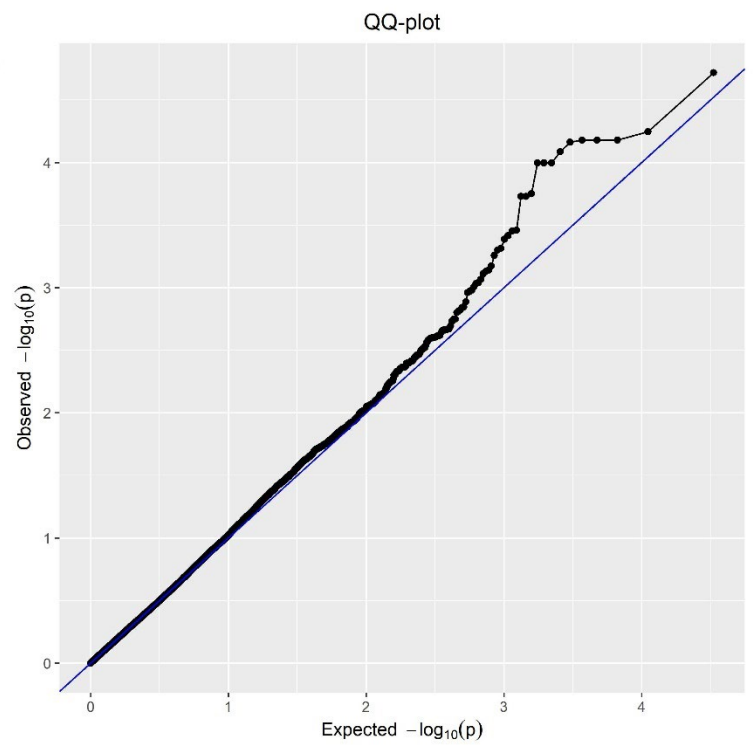

Head Width. Population structure correction based on Principal Coordinates and Kinship (left), or Kinship only (right).

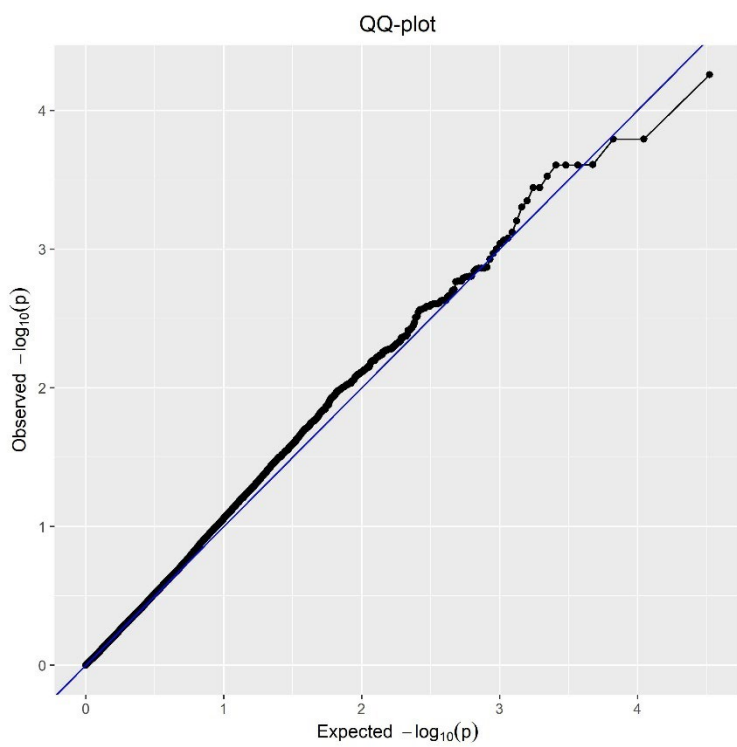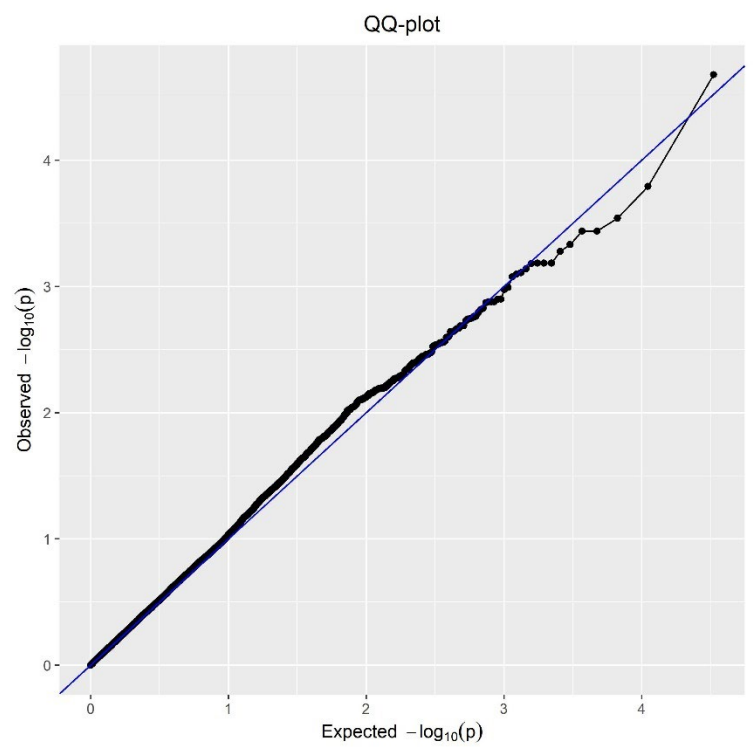

Head Height. Population structure correction based on Principal Coordinates and Kinship (left), or Kinship only (right).

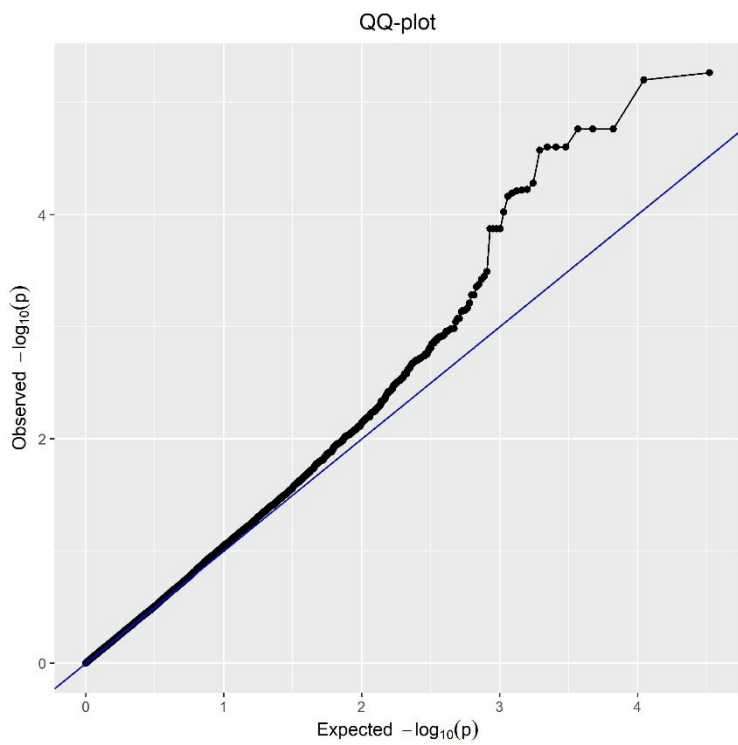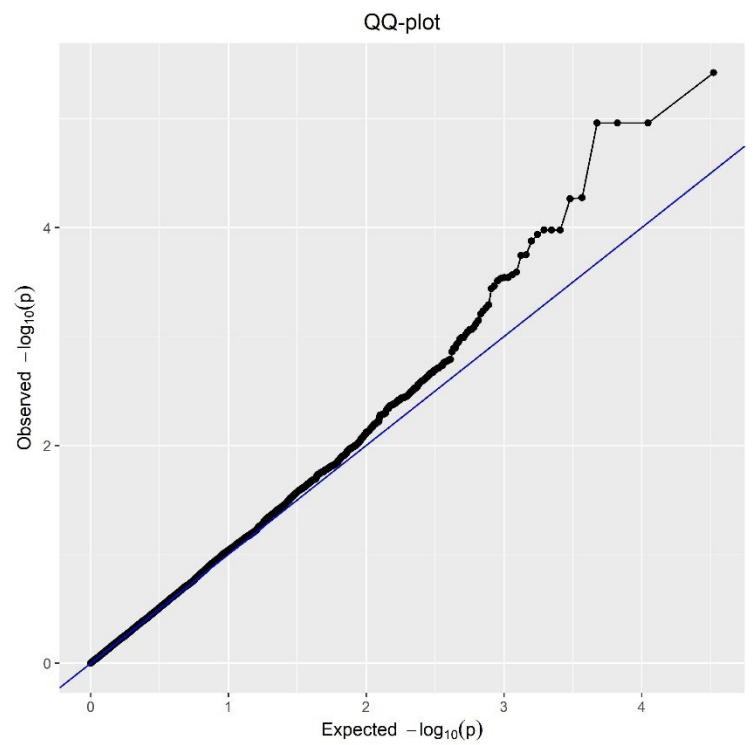

Head Ratio. Population structure correction based on Principal Coordinates and Kinship (left), or Kinship only (right).

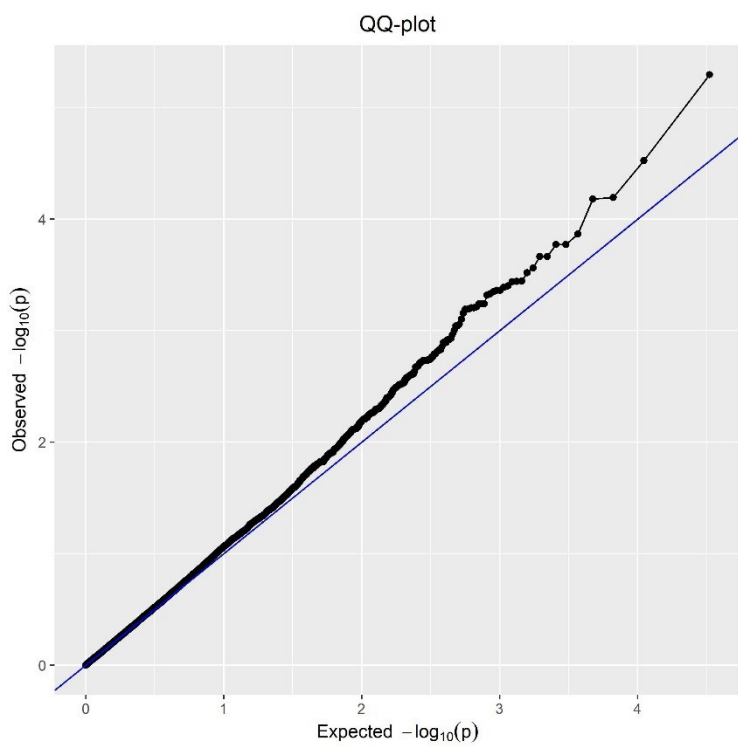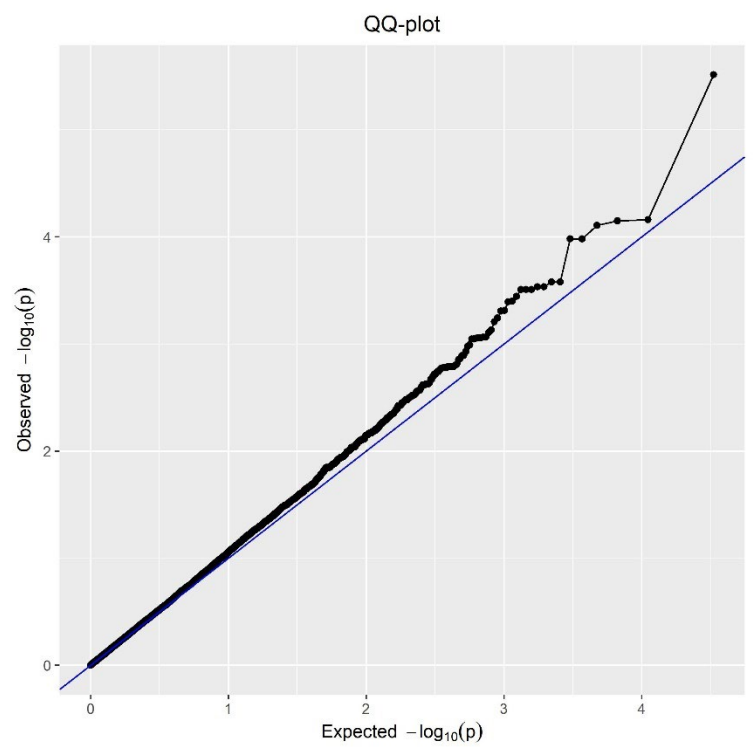

Supplement: 122_2022_4205_MOESM13_ESM.pdf [file 122_2022_4205_MOESM13_ESM.pdf]
